# Supplementary material for: Metallic Ni nanoparticles confined in hexagonally ordered mesoporous silica material
Source: Royal Society of Chemistry journal article supplement (doi:10.1039/b411074a), 2004-11-25
Supplement: b411074a.pdf [file b411074a.pdf]

Electronic Supplementary Information

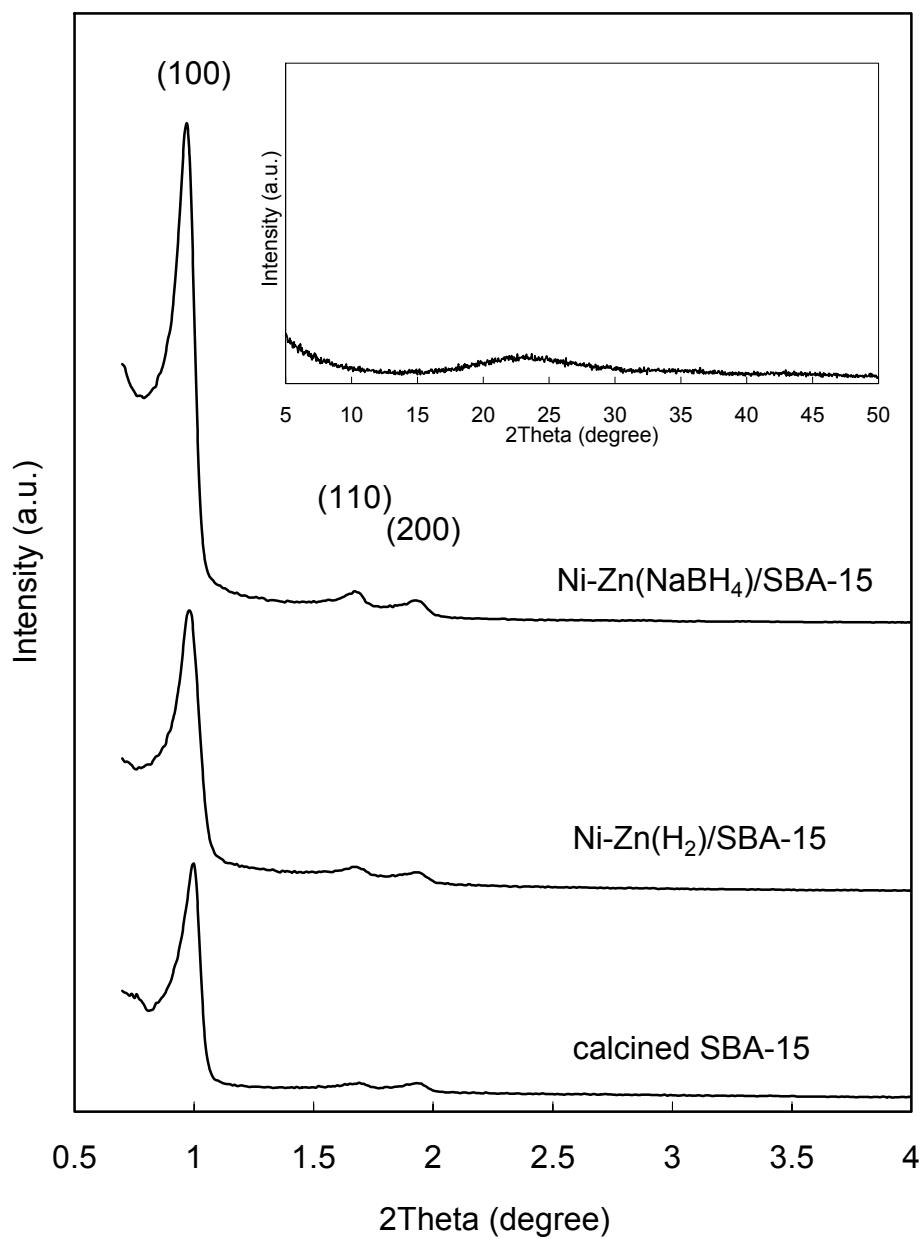

Figure 1. XRD patterns of SBA-15 materials before/after Ni-deposition.

Inset: XRD pattern of Ni-Zn(NaBH<sub>4</sub>)/SBA-15 in higher angle region.

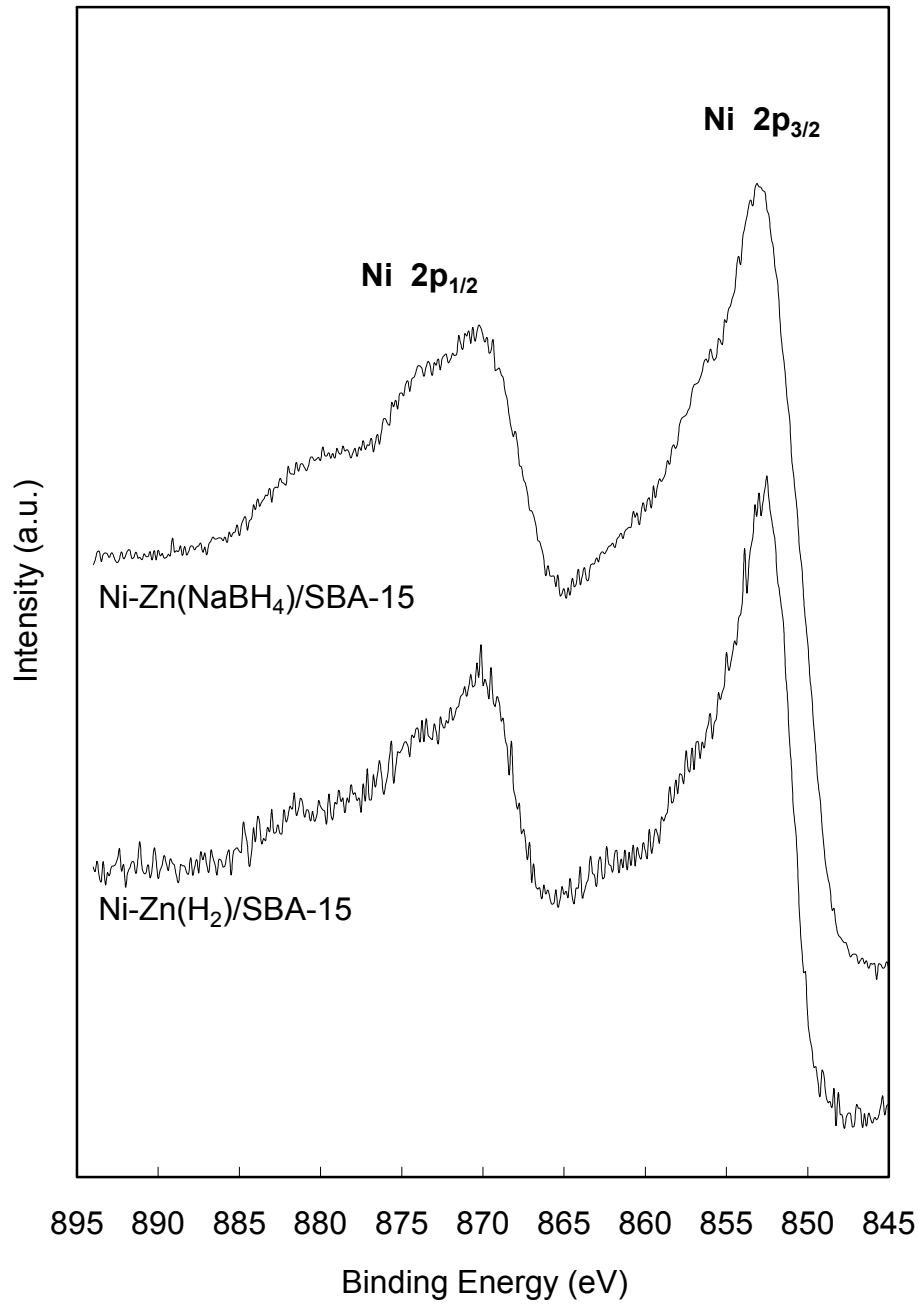

Figure 2. XPS spectra of Ni-deposited SBA-15 materials.

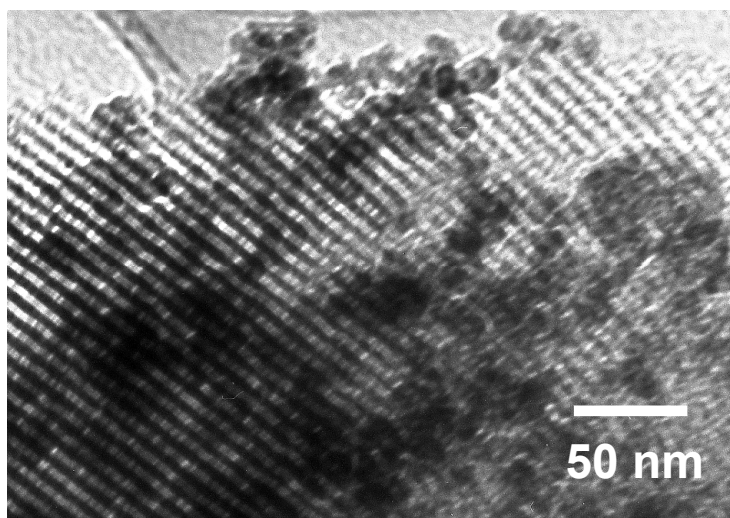

Figure 3. TEM image of Ni(NaBH<sub>4</sub>)/SBA-15 synthesized by the liquid phase reduction method in the absence of Zn.
